# Supplementary material
Source: MDPI journal article supplement (https://www.mdpi.com/2073-4352/14/1/35)
Supplement: s1 [file s1]

Supplementary file

**TableS1.** The calculated lattice thermal conductivity (LTC)  $\kappa_l$  ( $\text{Wm}^{-1} \cdot \text{K}^{-1}$ ) of Al-TM<sub>Al</sub> supercell at various temperatures, as plotted in Fig. 2 (b).

|                  | 100K  | 200K  | 300K | 400K | 500K | 600K | 700K | 800K | 900K | 1000K |
|------------------|-------|-------|------|------|------|------|------|------|------|-------|
| Al               | 25.48 | 12.00 | 7.38 | 5.04 | 3.63 | 2.69 | 2.02 | 1.52 | 1.14 | 0.83  |
| V <sub>Al</sub>  | 25.84 | 12.17 | 7.48 | 5.11 | 3.68 | 2.73 | 2.05 | 1.54 | 1.15 | 0.84  |
| Sc <sub>Al</sub> | 26.51 | 12.51 | 7.71 | 5.29 | 3.83 | 2.86 | 2.16 | 1.64 | 1.24 | 0.93  |
| Ti <sub>Al</sub> | 27.82 | 13.16 | 8.14 | 5.61 | 4.08 | 3.06 | 2.33 | 1.79 | 1.37 | 1.04  |
| V <sub>Al</sub>  | 28.06 | 13.27 | 8.22 | 5.66 | 4.12 | 3.09 | 2.36 | 1.81 | 1.39 | 1.05  |
| Cr <sub>Al</sub> | 28.00 | 13.25 | 8.20 | 5.65 | 4.11 | 3.08 | 2.35 | 1.80 | 1.38 | 1.05  |
| Mn <sub>Al</sub> | 27.87 | 13.18 | 8.15 | 5.61 | 4.08 | 3.06 | 2.33 | 1.79 | 1.37 | 1.03  |
| Fe <sub>Al</sub> | 27.58 | 13.04 | 8.06 | 5.54 | 4.03 | 3.01 | 2.29 | 1.75 | 1.34 | 1.01  |
| Co <sub>Al</sub> | 27.13 | 12.81 | 7.91 | 5.44 | 3.94 | 2.95 | 2.24 | 1.70 | 1.29 | 0.97  |
| Ni <sub>Al</sub> | 26.45 | 12.48 | 7.69 | 5.27 | 3.81 | 2.84 | 2.15 | 1.63 | 1.23 | 0.91  |
| Cu <sub>Al</sub> | 25.66 | 12.08 | 7.44 | 5.08 | 3.67 | 2.72 | 2.05 | 1.54 | 1.16 | 0.85  |
| Zn <sub>Al</sub> | 25.19 | 11.85 | 7.28 | 4.97 | 3.58 | 2.65 | 1.99 | 1.50 | 1.11 | 0.81  |
| Y <sub>Al</sub>  | 25.92 | 12.22 | 7.53 | 5.16 | 3.73 | 2.78 | 2.10 | 1.59 | 1.20 | 0.89  |
| Zr <sub>Al</sub> | 27.49 | 12.99 | 8.04 | 5.53 | 4.02 | 3.02 | 2.30 | 1.76 | 1.35 | 1.02  |
| Nb <sub>Al</sub> | 28.11 | 13.31 | 8.24 | 5.68 | 4.14 | 3.11 | 2.38 | 1.83 | 1.40 | 1.07  |
| Mo <sub>Al</sub> | 28.30 | 13.40 | 8.30 | 5.72 | 4.17 | 3.14 | 2.40 | 1.85 | 1.42 | 1.08  |
| Tc <sub>Al</sub> | 28.16 | 13.33 | 8.25 | 5.69 | 4.14 | 3.11 | 2.38 | 1.83 | 1.40 | 1.07  |
| Ru <sub>Al</sub> | 27.74 | 13.12 | 8.12 | 5.59 | 4.06 | 3.05 | 2.32 | 1.78 | 1.36 | 1.03  |
| Rh <sub>Al</sub> | 27.12 | 12.81 | 7.92 | 5.44 | 3.95 | 2.95 | 2.24 | 1.71 | 1.30 | 0.98  |
| Pd <sub>Al</sub> | 26.30 | 12.40 | 7.65 | 5.24 | 3.79 | 2.82 | 2.14 | 1.62 | 1.22 | 0.91  |
| Ag <sub>Al</sub> | 25.31 | 11.91 | 7.33 | 5.01 | 3.61 | 2.68 | 2.01 | 1.52 | 1.13 | 0.83  |
| Cd <sub>Al</sub> | 24.94 | 11.73 | 7.21 | 4.92 | 3.54 | 2.62 | 1.97 | 1.48 | 1.10 | 0.80  |
| Hf <sub>Al</sub> | 27.25 | 12.88 | 7.97 | 5.48 | 3.99 | 2.99 | 2.28 | 1.75 | 1.34 | 1.01  |
| Ta <sub>Al</sub> | 27.99 | 13.25 | 8.21 | 5.66 | 4.13 | 3.11 | 2.38 | 1.83 | 1.41 | 1.07  |
| W <sub>Al</sub>  | 28.21 | 13.36 | 8.28 | 5.71 | 4.17 | 3.14 | 2.40 | 1.85 | 1.43 | 1.09  |
| Re <sub>Al</sub> | 27.98 | 13.24 | 8.20 | 5.66 | 4.12 | 3.10 | 2.37 | 1.82 | 1.40 | 1.07  |
| Os <sub>Al</sub> | 27.69 | 13.09 | 8.11 | 5.58 | 4.07 | 3.05 | 2.33 | 1.79 | 1.37 | 1.04  |
| Ir <sub>Al</sub> | 27.11 | 12.81 | 7.92 | 5.44 | 3.95 | 2.96 | 2.25 | 1.72 | 1.31 | 0.99  |
| Pt <sub>Al</sub> | 26.36 | 12.44 | 7.67 | 5.27 | 3.82 | 2.85 | 2.16 | 1.64 | 1.25 | 0.93  |
| Au <sub>Al</sub> | 25.33 | 11.93 | 7.34 | 5.02 | 3.62 | 2.69 | 2.03 | 1.53 | 1.15 | 0.85  |
| Hg <sub>Al</sub> | 24.57 | 11.55 | 7.09 | 4.84 | 3.48 | 2.58 | 1.93 | 1.45 | 1.08 | 0.79  |

**TableS2.** The calculated electronic thermal conductivity (ETC)  $\kappa_1$  ( $\text{Wm}^{-1}\cdot\text{K}^{-1}$ ) of Al-TM<sub>Al</sub> supercell at various temperatures, as plotted in Fig. 2 (d).

|                  | 100K   | 200K   | 300K   | 400K   | 500K   | 600K   | 700K   | 800K   | 900K   | 1000K  |
|------------------|--------|--------|--------|--------|--------|--------|--------|--------|--------|--------|
| Al               | 203.34 | 217.81 | 223.61 | 226.07 | 227.01 | 227.09 | 226.61 | 225.72 | 224.51 | 223.06 |
| V <sub>Al</sub>  | 202.33 | 176.88 | 178.95 | 179.68 | 179.25 | 178.16 | 176.69 | 174.98 | 173.12 | 171.18 |
| Sc <sub>Al</sub> | 163.58 | 171.63 | 176.13 | 177.64 | 177.58 | 176.69 | 175.33 | 173.69 | 171.86 | 169.91 |
| Ti <sub>Al</sub> | 196.70 | 177.43 | 181.60 | 183.28 | 183.40 | 182.67 | 181.44 | 179.89 | 178.14 | 176.25 |
| V <sub>Al</sub>  | 191.26 | 172.96 | 177.43 | 179.98 | 181.13 | 181.33 | 180.85 | 179.86 | 178.50 | 176.88 |
| Cr <sub>Al</sub> | 188.33 | 173.21 | 178.41 | 180.87 | 181.79 | 181.82 | 181.25 | 180.22 | 178.87 | 177.27 |
| Mn <sub>Al</sub> | 204.36 | 174.78 | 176.13 | 178.09 | 179.39 | 179.90 | 179.71 | 178.93 | 177.69 | 176.10 |
| Fe <sub>Al</sub> | 168.79 | 175.68 | 178.67 | 179.91 | 180.14 | 179.69 | 178.77 | 177.52 | 212.57 | 192.20 |
| Co <sub>Al</sub> | 211.37 | 177.23 | 177.65 | 179.68 | 181.30 | 182.19 | 182.37 | 181.95 | 181.04 | 179.76 |
| Ni <sub>Al</sub> | 210.28 | 181.50 | 183.41 | 185.65 | 187.06 | 187.64 | 187.51 | 186.82 | 185.71 | 184.27 |
| Cu <sub>Al</sub> | 193.08 | 178.10 | 184.12 | 186.62 | 187.38 | 187.24 | 186.52 | 185.40 | 183.99 | 182.37 |
| Zn <sub>Al</sub> | 222.46 | 200.25 | 205.54 | 207.79 | 208.24 | 207.73 | 206.67 | 205.26 | 203.62 | 201.80 |
| Y <sub>Al</sub>  | 190.42 | 161.99 | 161.69 | 161.20 | 160.05 | 158.47 | 156.67 | 154.77 | 152.82 | 150.86 |
| Zr <sub>Al</sub> | 191.31 | 158.35 | 158.06 | 159.55 | 160.70 | 161.20 | 161.06 | 160.40 | 159.34 | 157.97 |
| Nb <sub>Al</sub> | 186.42 | 157.63 | 158.30 | 159.97 | 161.22 | 161.83 | 161.82 | 161.28 | 160.33 | 159.06 |
| Mo <sub>Al</sub> | 171.61 | 157.33 | 162.37 | 164.83 | 165.79 | 165.85 | 165.30 | 164.32 | 163.02 | 161.49 |
| Tc <sub>Al</sub> | 173.46 | 150.78 | 153.81 | 156.60 | 158.37 | 159.19 | 159.22 | 158.62 | 157.54 | 156.09 |
| Ru <sub>Al</sub> | 174.22 | 148.47 | 150.51 | 153.08 | 154.88 | 155.80 | 155.93 | 155.44 | 154.44 | 153.08 |
| Rh <sub>Al</sub> | 166.34 | 149.85 | 153.73 | 155.97 | 157.10 | 157.42 | 157.12 | 156.32 | 155.14 | 153.68 |
| Pd <sub>Al</sub> | 154.74 | 138.19 | 140.95 | 142.31 | 142.85 | 142.85 | 142.44 | 141.68 | 140.65 | 139.42 |
| Ag <sub>Al</sub> | 172.29 | 145.77 | 144.98 | 144.09 | 142.68 | 140.93 | 139.01 | 137.01 | 135.00 | 133.02 |
| Cd <sub>Al</sub> | 210.75 | 190.17 | 194.94 | 196.47 | 196.23 | 195.14 | 193.63 | 191.86 | 189.93 | 187.91 |
| Hf <sub>Al</sub> | 184.32 | 170.32 | 175.14 | 176.75 | 176.81 | 176.08 | 174.86 | 173.33 | 171.58 | 169.69 |
| Ta <sub>Al</sub> | 197.84 | 172.59 | 174.88 | 176.10 | 176.16 | 175.50 | 174.37 | 172.93 | 171.29 | 169.51 |
| W <sub>Al</sub>  | 167.59 | 156.71 | 162.70 | 165.63 | 166.97 | 167.32 | 166.98 | 166.10 | 164.82 | 163.25 |
| Re <sub>Al</sub> | 166.85 | 153.19 | 158.10 | 160.64 | 161.84 | 162.17 | 161.86 | 161.06 | 159.87 | 158.40 |
| Os <sub>Al</sub> | 169.58 | 148.59 | 151.66 | 153.88 | 155.03 | 155.38 | 155.13 | 154.42 | 153.36 | 152.05 |
| Ir <sub>Al</sub> | 161.99 | 140.51 | 142.88 | 144.74 | 145.74 | 146.07 | 145.87 | 145.27 | 144.35 | 143.18 |
| Pt <sub>Al</sub> | 133.77 | 114.18 | 115.51 | 117.07 | 118.27 | 119.10 | 119.57 | 119.70 | 119.53 | 119.11 |
| Au <sub>Al</sub> | 143.74 | 125.29 | 127.02 | 127.82 | 127.65 | 126.84 | 125.63 | 124.16 | 122.57 | 120.90 |
| Hg <sub>Al</sub> | 209.44 | 187.31 | 191.10 | 192.32 | 192.10 | 191.18 | 189.84 | 188.24 | 186.45 | 184.53 |

**TableS3.** The calculated total thermal conductivity (TC)  $\kappa_l$  ( $\text{Wm}^{-1}\cdot\text{k}^{-1}$ ) of Al-TM<sub>Al</sub> supercell at various temperatures, as plotted in Fig. 2 (d).

|                  | 100K   | 200K   | 300K   | 400K   | 500K   | 600K   | 700K   | 800K   | 900K   | 1000K  |
|------------------|--------|--------|--------|--------|--------|--------|--------|--------|--------|--------|
| Al               | 228.82 | 229.81 | 230.99 | 231.11 | 230.64 | 229.78 | 228.63 | 227.24 | 225.65 | 223.89 |
| V <sub>Al</sub>  | 228.17 | 189.04 | 186.43 | 184.78 | 182.93 | 180.89 | 178.74 | 176.52 | 174.27 | 172.02 |
| Sc <sub>Al</sub> | 190.09 | 184.14 | 183.85 | 182.93 | 181.41 | 179.55 | 177.50 | 175.33 | 173.10 | 170.84 |
| Ti <sub>Al</sub> | 224.52 | 190.59 | 189.75 | 188.89 | 187.48 | 185.73 | 183.77 | 181.68 | 179.51 | 177.29 |
| V <sub>Al</sub>  | 219.32 | 186.23 | 185.65 | 185.64 | 185.25 | 184.43 | 183.21 | 181.67 | 179.89 | 177.94 |
| Cr <sub>Al</sub> | 216.34 | 186.46 | 186.61 | 186.51 | 185.90 | 184.91 | 183.60 | 182.03 | 180.25 | 178.32 |
| Mn <sub>Al</sub> | 232.23 | 187.96 | 184.28 | 183.70 | 183.47 | 182.96 | 182.04 | 180.72 | 179.06 | 177.14 |
| Fe <sub>Al</sub> | 196.37 | 188.71 | 186.73 | 185.46 | 184.17 | 182.71 | 181.07 | 179.27 | 213.91 | 193.21 |
| Co <sub>Al</sub> | 238.50 | 190.05 | 185.57 | 185.12 | 185.24 | 185.13 | 184.61 | 183.65 | 182.34 | 180.73 |
| Ni <sub>Al</sub> | 236.73 | 193.98 | 191.10 | 190.92 | 190.87 | 190.47 | 189.65 | 188.45 | 186.94 | 185.18 |
| Cu <sub>Al</sub> | 218.74 | 190.18 | 191.55 | 191.70 | 191.05 | 189.96 | 188.57 | 186.95 | 185.15 | 183.22 |
| Zn <sub>Al</sub> | 247.65 | 212.11 | 212.82 | 212.77 | 211.82 | 210.38 | 208.66 | 206.76 | 204.73 | 202.61 |
| Y <sub>Al</sub>  | 216.35 | 174.21 | 169.22 | 166.36 | 163.78 | 161.25 | 158.77 | 156.36 | 154.02 | 151.76 |
| Zr <sub>Al</sub> | 218.80 | 171.35 | 166.09 | 165.08 | 164.73 | 164.22 | 163.36 | 162.16 | 160.69 | 158.99 |
| Nb <sub>Al</sub> | 214.54 | 170.93 | 166.54 | 165.65 | 165.36 | 164.94 | 164.19 | 163.11 | 161.74 | 160.13 |
| Mo <sub>Al</sub> | 199.90 | 170.73 | 170.67 | 170.56 | 169.96 | 168.98 | 167.70 | 166.16 | 164.44 | 162.58 |
| Tc <sub>Al</sub> | 201.62 | 164.10 | 162.06 | 162.29 | 162.52 | 162.31 | 161.60 | 160.45 | 158.94 | 157.16 |
| Ru <sub>Al</sub> | 201.96 | 161.59 | 158.62 | 158.67 | 158.94 | 158.84 | 158.26 | 157.22 | 155.80 | 154.11 |
| Rh <sub>Al</sub> | 193.47 | 162.67 | 161.65 | 161.41 | 161.04 | 160.37 | 159.36 | 158.04 | 156.45 | 154.66 |
| Pd <sub>Al</sub> | 181.04 | 150.60 | 148.60 | 147.55 | 146.65 | 145.68 | 144.57 | 143.30 | 141.88 | 140.33 |
| Ag <sub>Al</sub> | 197.60 | 157.68 | 152.30 | 149.10 | 146.29 | 143.61 | 141.02 | 138.53 | 136.14 | 133.85 |
| Cd <sub>Al</sub> | 235.69 | 201.90 | 202.15 | 201.39 | 199.77 | 197.77 | 195.59 | 193.34 | 191.04 | 188.72 |
| Hf <sub>Al</sub> | 211.57 | 183.19 | 183.10 | 182.23 | 180.80 | 179.07 | 177.14 | 175.08 | 172.92 | 170.71 |
| Ta <sub>Al</sub> | 225.83 | 185.83 | 183.09 | 181.76 | 180.29 | 178.60 | 176.74 | 174.76 | 172.70 | 170.59 |
| W <sub>Al</sub>  | 195.80 | 170.06 | 170.98 | 171.35 | 171.14 | 170.46 | 169.38 | 167.95 | 166.25 | 164.34 |
| Re <sub>Al</sub> | 194.83 | 166.43 | 166.30 | 166.30 | 165.96 | 165.27 | 164.23 | 162.88 | 161.27 | 159.47 |
| Os <sub>Al</sub> | 197.26 | 161.68 | 159.76 | 159.47 | 159.10 | 158.43 | 157.46 | 156.21 | 154.73 | 153.09 |
| Ir <sub>Al</sub> | 189.09 | 153.32 | 150.80 | 150.19 | 149.70 | 149.03 | 148.12 | 146.99 | 145.66 | 144.17 |
| Pt <sub>Al</sub> | 160.14 | 126.62 | 123.19 | 122.34 | 122.09 | 121.95 | 121.72 | 121.34 | 120.78 | 120.04 |
| Au <sub>Al</sub> | 169.08 | 137.22 | 134.36 | 132.84 | 131.28 | 129.53 | 127.65 | 125.70 | 123.72 | 121.75 |
| Hg <sub>Al</sub> | 234.00 | 198.86 | 198.19 | 197.16 | 195.59 | 193.75 | 191.77 | 189.69 | 187.53 | 185.32 |

**TableS4.** The calculated total thermal conductivity (TC)  $\kappa_1$  ( $\text{Wm}^{-1} \cdot \text{K}^{-1}$ ) of the second phase particle  $\text{L1}_2\text{-Al}_3\text{TM}$  with 1% solute atoms TM added at 300K and 600K.

|                        | 300K    | 600K    |
|------------------------|---------|---------|
| $\text{Al}_3\text{Sc}$ | 224. 03 | 223. 13 |
| $\text{Al}_3\text{Ti}$ | 224. 45 | 223. 19 |
| $\text{Al}_3\text{V}$  | 224. 60 | 223. 23 |
| $\text{Al}_3\text{Cr}$ | 224. 71 | 223. 25 |
| $\text{Al}_3\text{Mn}$ | 224. 73 | 223. 25 |
| $\text{Al}_3\text{Fe}$ | 224. 67 | 223. 20 |
| $\text{Al}_3\text{Co}$ | 224. 33 | 222. 98 |
| $\text{Al}_3\text{Ni}$ | 224. 11 | 222. 98 |
| $\text{Al}_3\text{Cu}$ | 224. 01 | 223. 31 |
| $\text{Al}_3\text{Zn}$ | 223. 95 | 223. 73 |
| $\text{Al}_3\text{Y}$  | 223. 42 | 222. 77 |
| $\text{Al}_3\text{Zr}$ | 224. 31 | 223. 13 |
| $\text{Al}_3\text{Nb}$ | 224. 76 | 223. 33 |
| $\text{Al}_3\text{Mo}$ | 224. 80 | 223. 31 |
| $\text{Al}_3\text{Tc}$ | 224. 81 | 223. 30 |
| $\text{Al}_3\text{Ru}$ | 224. 79 | 223. 30 |
| $\text{Al}_3\text{Rh}$ | 224. 55 | 223. 31 |
| $\text{Al}_3\text{Pd}$ | 223. 90 | 223. 08 |
| $\text{Al}_3\text{Ag}$ | 223. 65 | 223. 27 |
| $\text{Al}_3\text{Cd}$ | 223. 76 | 223. 56 |
| $\text{Al}_3\text{Hf}$ | 223. 75 | 222. 90 |
| $\text{Al}_3\text{Ta}$ | 224. 49 | 223. 25 |
| $\text{Al}_3\text{W}$  | 224. 51 | 223. 21 |
| $\text{Al}_3\text{Re}$ | 224. 68 | 223. 29 |
| $\text{Al}_3\text{Os}$ | 224. 72 | 223. 34 |
| $\text{Al}_3\text{Ir}$ | 224. 65 | 223. 43 |
| $\text{Al}_3\text{Pt}$ | 224. 06 | 223. 24 |
| $\text{Al}_3\text{Au}$ | 223. 58 | 223. 13 |
| $\text{Al}_3\text{Hg}$ | 223. 40 | 223. 32 |

**TableS5.** The calculated total thermal conductivity (TC)  $\kappa_l$  ( $\text{Wm}^{-1}\cdot\text{K}^{-1}$ ) of Al-TM<sub>Al</sub> solid solution with 1% solute atoms TM added at 300K and 600K.

|                  | 300K   | 600K   |
|------------------|--------|--------|
| Sc <sub>Al</sub> | 180.08 | 176.98 |
| Ti <sub>Al</sub> | 186.45 | 175.53 |
| V <sub>Al</sub>  | 182.02 | 182.20 |
| Cr <sub>Al</sub> | 183.06 | 180.80 |
| Mn <sub>Al</sub> | 180.55 | 181.32 |
| Fe <sub>Al</sub> | 183.19 | 179.22 |
| Co <sub>Al</sub> | 181.94 | 178.94 |
| Ni <sub>Al</sub> | 187.91 | 181.56 |
| Cu <sub>Al</sub> | 188.40 | 187.33 |
| Zn <sub>Al</sub> | 211.37 | 186.77 |
| Y <sub>Al</sub>  | 164.27 | 208.83 |
| Zr <sub>Al</sub> | 160.90 | 155.77 |
| Nb <sub>Al</sub> | 161.38 | 158.97 |
| Mo <sub>Al</sub> | 165.85 | 159.75 |
| Tc <sub>Al</sub> | 156.55 | 164.12 |
| Ru <sub>Al</sub> | 152.83 | 156.91 |
| Rh <sub>Al</sub> | 156.10 | 153.17 |
| Pd <sub>Al</sub> | 142.00 | 154.82 |
| Ag <sub>Al</sub> | 146.01 | 138.95 |
| Cd <sub>Al</sub> | 199.84 | 136.71 |
| Hf <sub>Al</sub> | 179.27 | 195.21 |
| Ta <sub>Al</sub> | 179.26 | 175.01 |
| W <sub>Al</sub>  | 166.18 | 174.51 |
| Re <sub>Al</sub> | 161.13 | 165.72 |
| Os <sub>Al</sub> | 154.06 | 160.11 |
| Ir <sub>Al</sub> | 144.38 | 152.72 |
| Pt <sub>Al</sub> | 114.56 | 142.57 |
| Au <sub>Al</sub> | 126.63 | 113.32 |
| Hg <sub>Al</sub> | 195.57 | 121.51 |

[TableS6](#). The optimized Al-W is taken as an example to export a copy of the extxyz file with lattice parameters and atomic positions.

108

```
Lattice="12.1340300578217981 0.0 0.0 0.0 12.1334160840703511 0.0 0.0 0.0
12.1334160840703511"Properties=species:S:1:pos:R:3 pbc="T T T"
Al -0.000576616538445 0.000000000000000 0.000000000000000
Al 0.000057694741742 2.021937325776550 2.021937325776550
Al 2.022174393543756 0.000000000000000 2.022698420778172
Al 2.022174393543756 2.022698420778172 0.000000000000000
Al 4.045048793975447 0.000000000000000 0.000000000000000
Al 4.044529617331508 2.021954132280426 2.021954132280426
Al 6.065817948289804 0.000000000000000 2.017824298090235
Al 6.065817948289804 2.017824298090235 0.000000000000000
Al 8.089223409402120 0.000000000000000 0.000000000000000
Al 8.089522458407775 2.005845171665302 2.005845171665302
Al 10.112963472307738 0.000000000000000 2.017434973060051
Al 10.112963472307738 2.017434973060051 0.000000000000000
Al 0.004614699598882 4.043042020458578 0.000000000000000
Al 0.016420562044235 6.066708042035176 2.005926473298810
Al 2.022336194567511 4.043170582302055 2.017728025933748
Al 2.022249268751801 6.066708042035176 0.000000000000000
Al 4.039921506216094 4.043441021221639 0.000000000000000
Al 4.028387683903896 6.066708042035176 2.005856396354352
Al 6.061589482003898 4.039036386095544 2.012961376931206
Al 6.067164176638882 6.066708042035176 0.000000000000000
Al 8.089250431817813 4.044769614889340 0.000000000000000
Al 8.089302796078950 6.066708042035176 2.018598851385362
Al 10.117170632589932 4.039215777728941 2.013052011947769
Al 10.111600735123769 6.066708042035176 0.000000000000000
Al 0.004614699598882 8.090374540631995 0.000000000000000
Al 0.000057694741742 10.111478042263432 2.021937325776550
Al 2.022336194567511 8.090245978788520 2.017728025933748
Al 2.022174393543756 10.110716947261812 0.000000000000000
Al 4.039921506216094 8.089975539868933 0.000000000000000
Al 4.044529617331508 10.111461235759556 2.021954132280426
Al 6.061589482003898 8.094380174995031 2.012961376931206
Al 6.065817948289804 10.115591069949746 0.000000000000000
Al 8.089250431817813 8.088646946201235 0.000000000000000
Al 8.089522458407775 10.127570196374679 2.005845171665302
Al 10.117170632589932 8.094200783361631 2.013052011947769
Al 10.112963472307738 10.115980394979930 0.000000000000000
Al 0.004614699598882 0.000000000000000 4.043042020458578
```

|    |                    |                    |                    |
|----|--------------------|--------------------|--------------------|
| Al | 0.016420562044235  | 2.005926473298810  | 6.066708042035176  |
| Al | 2.022249268751801  | 0.000000000000000  | 6.066708042035176  |
| Al | 2.022336194567511  | 2.017728025933748  | 4.043170582302055  |
| Al | 4.039921506216094  | 0.000000000000000  | 4.043441021221639  |
| Al | 4.028387683903896  | 2.005856396354352  | 6.066708042035176  |
| Al | 6.067164176638882  | 0.000000000000000  | 6.066708042035176  |
| Al | 6.061589482003898  | 2.012961376931206  | 4.039036386095544  |
| Al | 8.089250431817813  | 0.000000000000000  | 4.044769614889340  |
| Al | 8.089302796078950  | 2.018598851385362  | 6.066708042035176  |
| Al | 10.111600735123769 | 0.000000000000000  | 6.066708042035176  |
| Al | 10.117170632589932 | 2.013052011947769  | 4.039215777728941  |
| Al | 0.008934738233151  | 4.039133747723120  | 4.039133747723120  |
| Al | 0.003513108383319  | 6.066708042035176  | 6.066708042035176  |
| Al | 2.022200768473422  | 4.044768844320469  | 6.066708042035176  |
| Al | 2.022200768473422  | 6.066708042035176  | 4.044768844320469  |
| Al | 4.035920843892439  | 4.039307035719194  | 4.039307035719194  |
| Al | 4.041104778967400  | 6.066708042035176  | 6.066708042035176  |
| Al | 6.019631059821107  | 3.996641657240182  | 6.066708042035176  |
| Al | 6.019631059821107  | 6.066708042035176  | 3.996641657240182  |
| Al | 8.089211446208632  | 3.996394979575352  | 3.996394979575352  |
| Al | 10.159349751720885 | 3.996902077821908  | 6.066708042035176  |
| Al | 10.159349751720885 | 6.066708042035176  | 3.996902077821908  |
| Al | 0.008934738233151  | 8.094282813367457  | 4.039133747723120  |
| Al | 0.016420562044235  | 10.127488894741171 | 6.066708042035176  |
| Al | 2.022200768473422  | 8.088647716770103  | 6.066708042035176  |
| Al | 2.022336194567511  | 10.115687342106234 | 4.043170582302055  |
| Al | 4.035920843892439  | 8.094109525371382  | 4.039307035719194  |
| Al | 4.028387683903896  | 10.127558971685628 | 6.066708042035176  |
| Al | 6.019631059821107  | 8.136774903850393  | 6.066708042035176  |
| Al | 6.061589482003898  | 10.120453991108775 | 4.039036386095544  |
| Al | 8.089211446208632  | 8.137021581515222  | 3.996394979575352  |
| Al | 8.089302796078950  | 10.114816516654621 | 6.066708042035176  |
| Al | 10.159349751720885 | 8.136514483268664  | 6.066708042035176  |
| Al | 10.117170632589932 | 10.120363356092215 | 4.039215777728941  |
| Al | 0.004614699598882  | 0.000000000000000  | 8.090374540631995  |
| Al | 0.000057694741742  | 2.021937325776550  | 10.111478042263432 |
| Al | 2.022174393543756  | 0.000000000000000  | 10.110716947261812 |
| Al | 2.022336194567511  | 2.017728025933748  | 8.090245978788520  |
| Al | 4.039921506216094  | 0.000000000000000  | 8.089975539868933  |
| Al | 4.044529617331508  | 2.021954132280426  | 10.111461235759556 |
| Al | 6.065817948289804  | 0.000000000000000  | 10.115591069949746 |
| Al | 6.061589482003898  | 2.012961376931206  | 8.094380174995031  |
| Al | 8.089250431817813  | 0.000000000000000  | 8.088646946201235  |
| Al | 8.089522458407775  | 2.005845171665302  | 10.127570196374679 |

|    |                    |                    |                    |
|----|--------------------|--------------------|--------------------|
| Al | 10.112963472307738 | 0.000000000000000  | 10.115980394979930 |
| Al | 10.117170632589932 | 2.013052011947769  | 8.094200783361631  |
| Al | 0.008934738233151  | 4.039133747723120  | 8.094282813367457  |
| Al | 0.016420562044235  | 6.066708042035176  | 10.127488894741171 |
| Al | 2.022336194567511  | 4.043170582302055  | 10.115687342106234 |
| Al | 2.022200768473422  | 6.066708042035176  | 8.088647716770103  |
| Al | 4.035920843892439  | 4.039307035719194  | 8.094109525371382  |
| Al | 4.028387683903896  | 6.066708042035176  | 10.127558971685628 |
| Al | 6.061589482003898  | 4.039036386095544  | 10.120453991108775 |
| Al | 6.019631059821107  | 6.066708042035176  | 8.136774903850393  |
| Al | 8.089211446208632  | 3.996394979575352  | 8.137021581515222  |
| Al | 8.089302796078950  | 6.066708042035176  | 10.114816516654621 |
| Al | 10.117170632589932 | 4.039215777728941  | 10.120363356092215 |
| Al | 10.159349751720885 | 6.066708042035176  | 8.136514483268664  |
| Al | 0.008934738233151  | 8.094282813367457  | 8.094282813367457  |
| Al | 0.000057694741742  | 10.111478042263432 | 10.111478042263432 |
| Al | 2.022336194567511  | 8.090245978788520  | 10.115687342106234 |
| Al | 2.022336194567511  | 10.115687342106234 | 8.090245978788520  |
| Al | 4.035920843892439  | 8.094109525371382  | 8.094109525371382  |
| Al | 4.044529617331508  | 10.111461235759556 | 10.111461235759556 |
| Al | 6.061589482003898  | 8.094380174995031  | 10.120453991108775 |
| Al | 6.061589482003898  | 10.120453991108775 | 8.094380174995031  |
| Al | 8.089211446208632  | 8.137021581515222  | 8.137021581515222  |
| Al | 8.089522458407775  | 10.127570196374679 | 10.127570196374679 |
| Al | 10.117170632589932 | 8.094200783361631  | 10.120363356092215 |
| Al | 10.117170632589932 | 10.120363356092215 | 8.094200783361631  |
| W  | 8.089388500543768  | 6.066708042035176  | 6.066708042035176  |
